# Supplementary material for: High strength, superior fire retardancy, and dimensional stability of cellulosic hybrids
Source: Royal Society of Chemistry journal article supplement (doi:10.1039/d3gc02791k), 2023-01-01
Supplement: d3gc02791k1.pdf [file d3gc02791k1.pdf]

## High strength, superior fire retardancy and dimensional stability of cellulosic hybrids

Wen He <sup>a,1,\*</sup>, Rui Wang <sup>a,1</sup>, Qunyan Pang <sup>a</sup>, Ziliang Dai<sup>a</sup>, Shuang Liang <sup>a</sup>, Bairen Wei  
<sup>a</sup>, Qiuling Ji <sup>a</sup>, Wenxuan Li <sup>a</sup>, Gangzheng Hu <sup>a</sup>, Yue Jiao <sup>a,\*</sup>, Tripti Singh <sup>b,c</sup>, Qiliang Fu  
<sup>a,b,\*</sup>

<sup>a</sup> Co-Innovation Center of Efficient Processing and Utilization of Forest Resources,  
International Innovation Center for Forest Chemicals and Materials, College of  
Materials Science and Engineering, Nanjing Forestry University, Nanjing 210037,  
China

<sup>b</sup> Scion, 49 Sala Street, Private Bag 3020, Rotorua 3046, New Zealand

<sup>c</sup> National Centre for Timber Durability and Design Life, University of the Sunshine  
Coast, Sippy Downs, QLD 4556, Australia

<sup>d</sup> Fujian Joshine Bamboo Co., Ltd.

\* Corresponding authors: [hewen2011@njfu.edu.cn](mailto:hewen2011@njfu.edu.cn) (W. He); Tel.: +86-138-0515-7249  
[jiaoyue@njfu.edu.cn](mailto:jiaoyue@njfu.edu.cn) (Y. Jiao); [qiliang.fu@njfu.edu.cn](mailto:qiliang.fu@njfu.edu.cn) (Q. Fu)

<sup>1</sup> These authors contributed equally to this work.

**Table S1** Tensile strength.

| Group                 | Tensile strength | Reference |
|-----------------------|------------------|-----------|
| Cellulose microfibril | 1.6-3 GPa        | 1         |
| Bamboo fiber          | 0.3-1.4 GPa      | 2         |
| Nature bamboo         | 80-160 MPa       | 3         |

**Table S2** The concentration of CaCl<sub>2</sub> solution and Na<sub>2</sub>CO<sub>3</sub> solution.

| Group    | CaCl <sub>2</sub> concentration<br>(mol/L) | Na <sub>2</sub> CO <sub>3</sub> concentration<br>(mol/L) |
|----------|--------------------------------------------|----------------------------------------------------------|
| CMDB-0.1 | 0.1                                        | 0.1                                                      |
| CMDB-0.5 | 0.5                                        | 0.5                                                      |
| CMDB-0.9 | 0.9                                        | 0.9                                                      |
| CMDB-1.3 | 1.3                                        | 1.3                                                      |

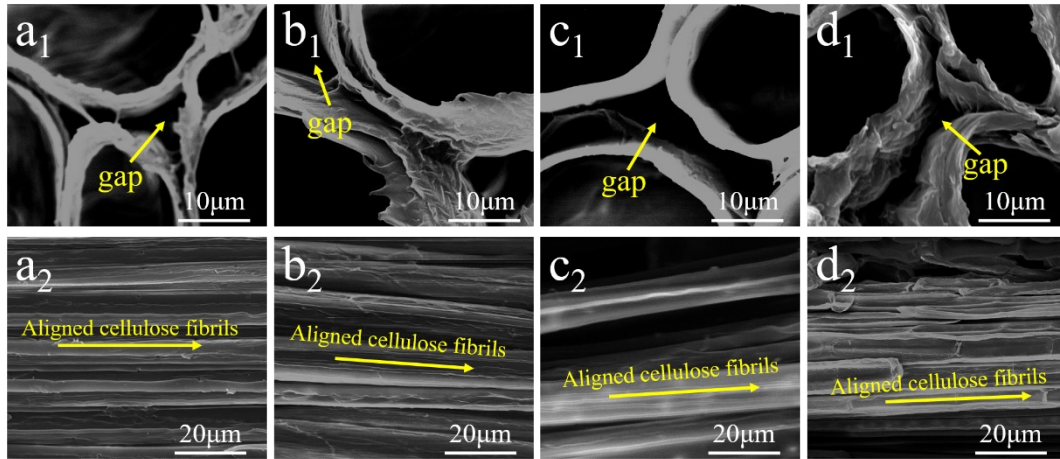

**Fig. S1.** Microstructure of (a) DB<sub>2</sub>; (b) DB<sub>4</sub>; (c) DB<sub>6</sub>; (d) DB<sub>8</sub>.

**Table S3** The chemical compositions content of NB, DNB<sub>2</sub>, DNB<sub>4</sub>, DNB<sub>6</sub> and DNB<sub>8</sub>.

| Sample          | Hemicellulose (%) | Cellulose (%) | Lignin (%) |
|-----------------|-------------------|---------------|------------|
| NB              | 20.56             | 55.85         | 22.27      |
| DB <sub>2</sub> | 16.98             | 70.08         | 11.32      |
| DB <sub>4</sub> | 11.33             | 78.47         | 8.28       |
| DB <sub>6</sub> | 10.63             | 85.48         | 1.02       |
| DB <sub>8</sub> | 9.16              | 89.66         | 0.05       |

Note: Hemicellulose, cellulose and lignin are the main chemical components of bamboo. The rest fraction of the materials contains extractives and ash.

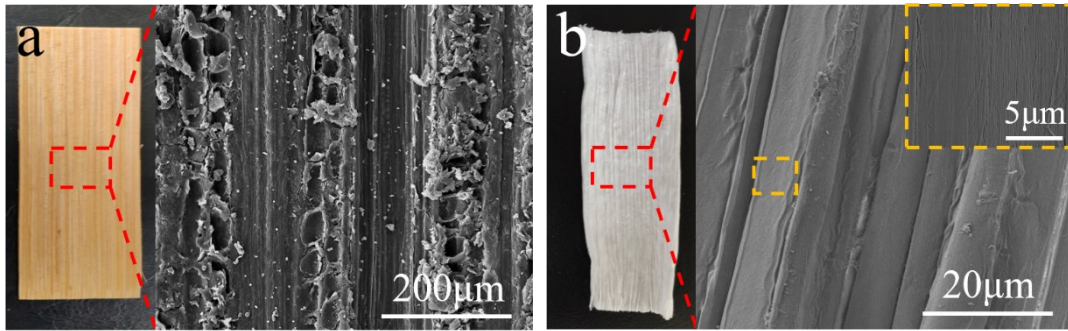

**Fig. S2.** Photographs and SEM images of the longitudinal section of (a) NB and (b) DB<sub>6</sub>.

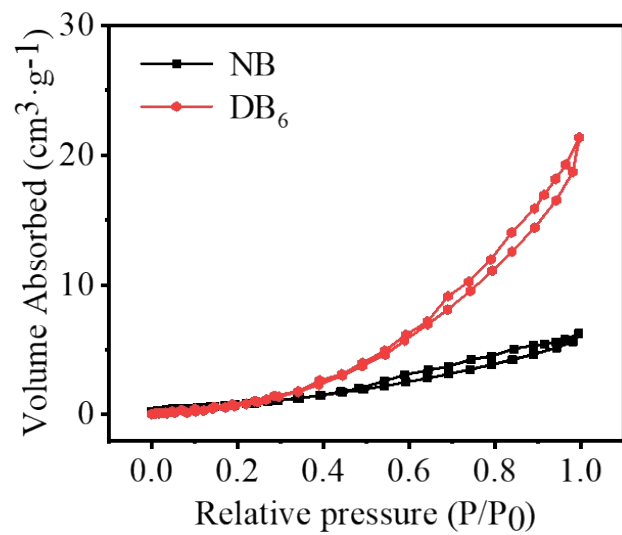

**Fig. S3.** Nitrogen adsorption-desorption isotherms of NB and DB<sub>6</sub>.

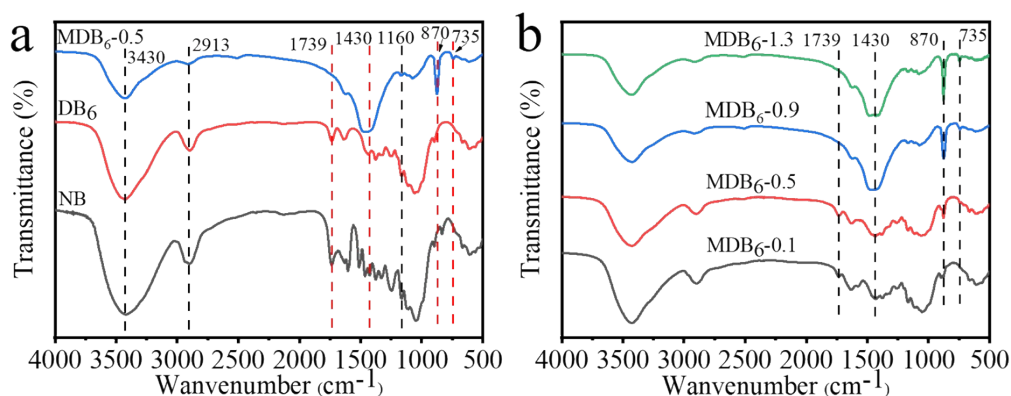

**Fig. S4.** FT-IR spectra of (a) NB, DB<sub>6</sub> and MDB<sub>6</sub>-0.5 and (b) MDB<sub>6</sub> with different CaCO<sub>3</sub> concentration treatments.

Fig. S4a displays the FT-IR spectra of NB, DB<sub>6</sub> and MDB<sub>6</sub>-0.5. The FT-IR spectrum of NB appears the distinct characteristic peaks of lignin, which are mainly located at 1631 cm<sup>-1</sup> and 1505 cm<sup>-1</sup>. However, these peaks disappeared from the FT-IR spectrum DB<sub>6</sub>, which indicates the lignin was almost completely removed from the bamboo cells. The peaks at 2913 cm<sup>-1</sup> and 1160 cm<sup>-1</sup> are assigned to cellulose<sup>4</sup>, the new peaks of 1430 cm<sup>-1</sup> and 870 cm<sup>-1</sup> appeared on the FT-IR spectrum of MDB<sub>6</sub>-0.5, this ascribed to the non-vibrational stretching symmetry peak of C-O<sup>5</sup>, and vibration peak of CO<sub>3</sub><sup>2-</sup>, respectively. The intensity of characteristic peaks located at 1430 cm<sup>-1</sup>, 870 cm<sup>-1</sup> and 735 cm<sup>-1</sup> significantly enhanced with the increase of mineralized concentration of CaCO<sub>3</sub> (Fig. S4b). The FT-IR results suggested that the CaCO<sub>3</sub> nanoparticles were successfully deposited on the DB<sub>6</sub>.



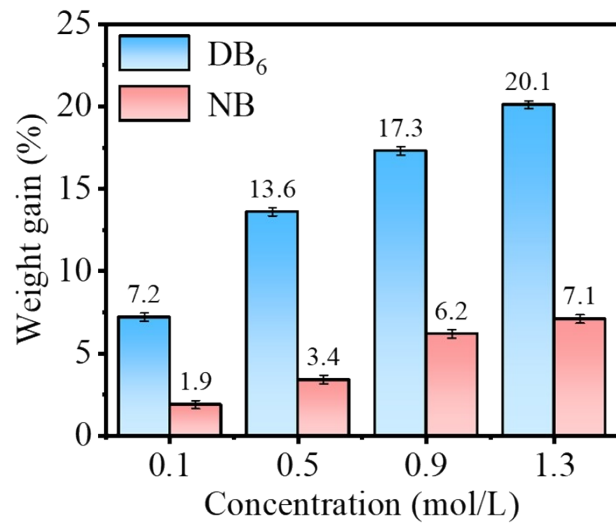

**Fig. S5.** The weight gain of NB and DB<sub>6</sub> with different CaCO<sub>3</sub> concentration treatment.

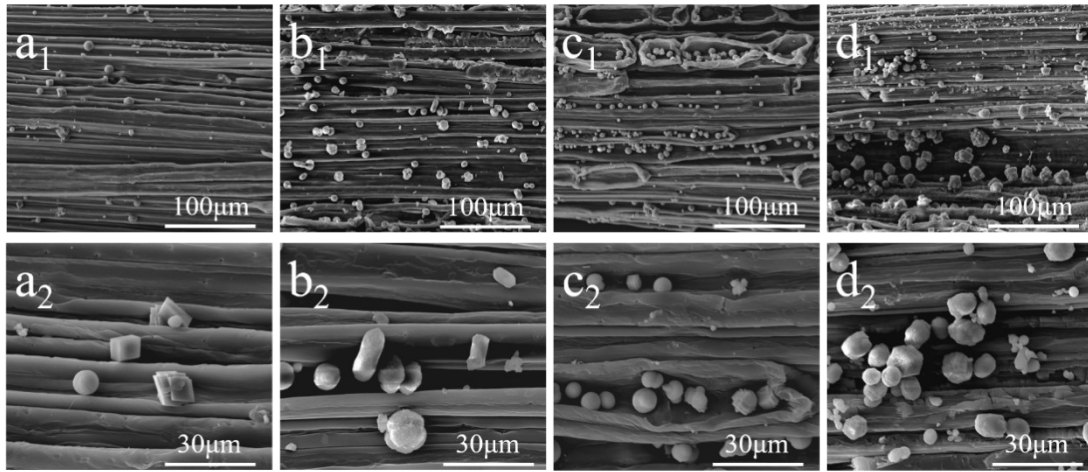

**Fig. S6.** SEM images of (a) MDB<sub>6</sub>-0.1; (b) MDB<sub>6</sub>-0.5; (c) MDB<sub>6</sub>-0.9; (d) MDB<sub>6</sub>-1.3.

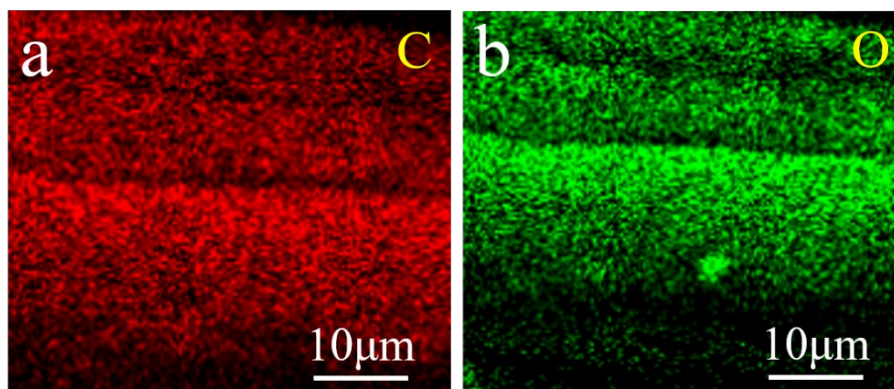

**Fig. S7.** (a) C element and (b) O element of MDB<sub>6</sub>-0.5.

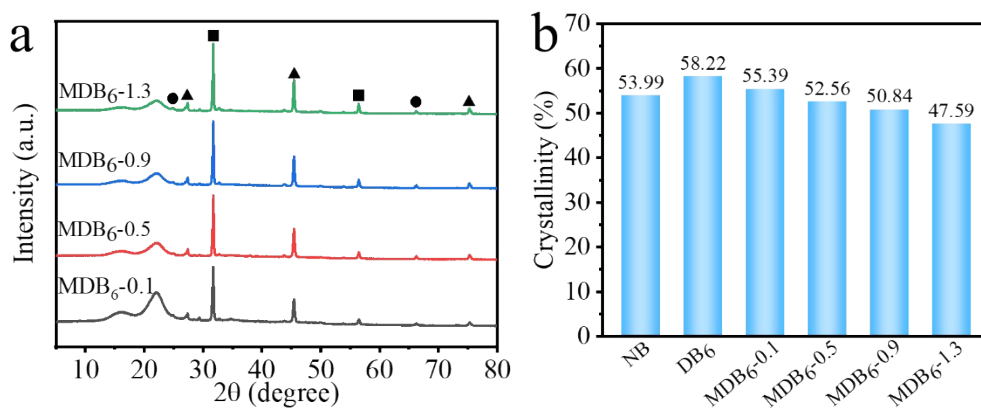

**Fig. S8.** (a) XRD curves of MDNB<sub>6</sub> with different CaCO<sub>3</sub> concentration treatments. (b) Crystallinity of NB, DNB<sub>6</sub> and MDNB<sub>6</sub> with different CaCO<sub>3</sub> concentration treatments.

The intensity of diffraction peaks of various CaCO<sub>3</sub> crystal significantly enhanced with the increase of concentration of Na<sub>2</sub>CO<sub>3</sub> and CaCl<sub>2</sub> (Fig. S8a). The crystallinity degree of NB, DB<sub>6</sub> and all MDNB<sub>6</sub> -0.5 specimens was calculated based on Segal method<sup>6</sup>. The crystallinity degree of the DB<sub>6</sub> specimen was about 58.22%, which is higher than that of NB (53.99%). However, the MDNB<sub>6</sub>-0.5 specimen showed a slightly lower crystallinity of 52.56% as the cellulose crystalline region was slightly hydrolyzed after the mineralization process. The crystallinity of MDNB<sub>6</sub> significantly decreased due to the increase of concentration of Na<sub>2</sub>CO<sub>3</sub> and CaCl<sub>2</sub> (Fig. S8b).

**Table S4** Densities of all specimens.

| Sample                 | Density(g/cm <sup>3</sup> ) |
|------------------------|-----------------------------|
| NB                     | 0.67                        |
| DB <sub>6</sub>        | 0.36                        |
| CDB                    | 1.16                        |
| CMDB <sub>6</sub> -0.1 | 1.18                        |
| CMDB <sub>6</sub> -0.5 | 1.20                        |
| CMDB <sub>6</sub> -0.9 | 1.21                        |
| CMDB <sub>6</sub> -1.3 | 1.23                        |

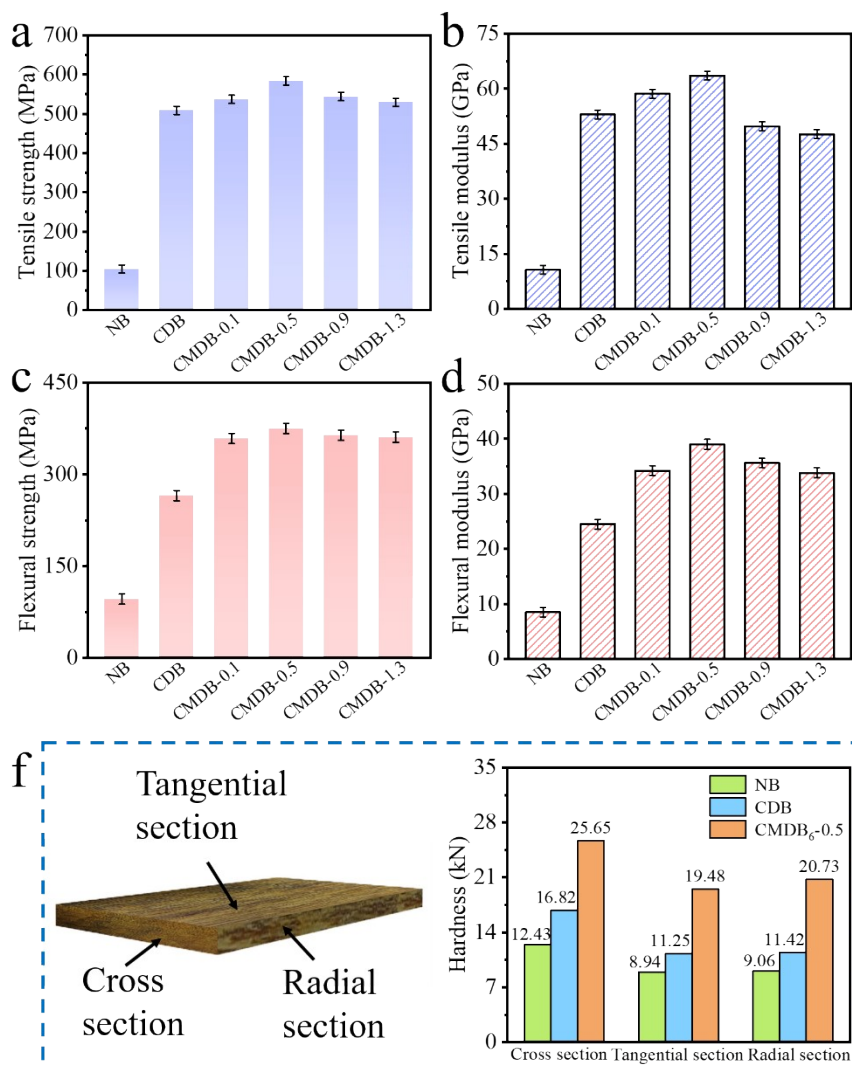

**Fig. S9.** (a) Tensile strength; (b) Tensile modulus; (c) Flexural strength; (d) Flexural modulus of all specimens. (f) Hardness of NB, CDB and CMDB<sub>6</sub>-0.5.

The hardness of NB, CDB and CMDB-0.5 specimens was measured, as shown in Fig. S9f. The CMDB-0.5 specimen displayed the highest hardness value in cross-section (25.65 kN), tangential section (19.48 kN), and radial section (20.73 kN), respectively. Mineralization treatment resulted in the successive deposition of a CaCO<sub>3</sub> thin layer onto the cellulose microfibrils, significantly enhancing the hardness of CMDB specimens in three sections<sup>7</sup>.

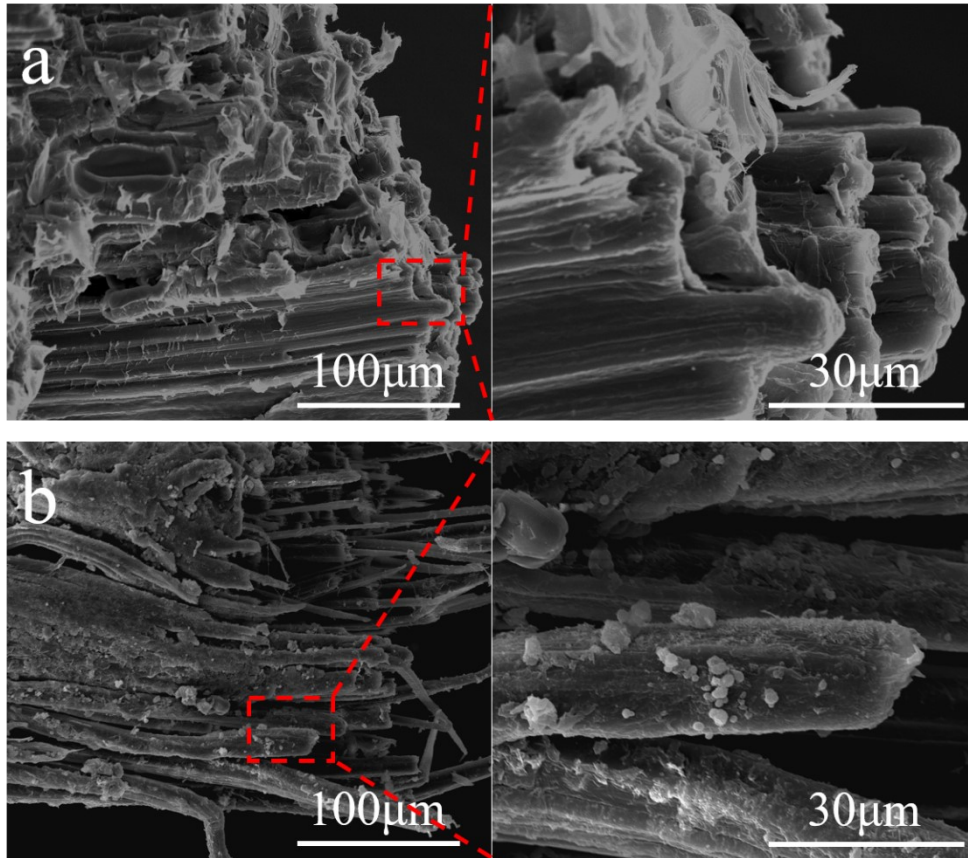

**Fig. S10.** SEM images of the tensile fracture surface of (a) CDB and (b) CMDB<sub>6</sub>-0.5.

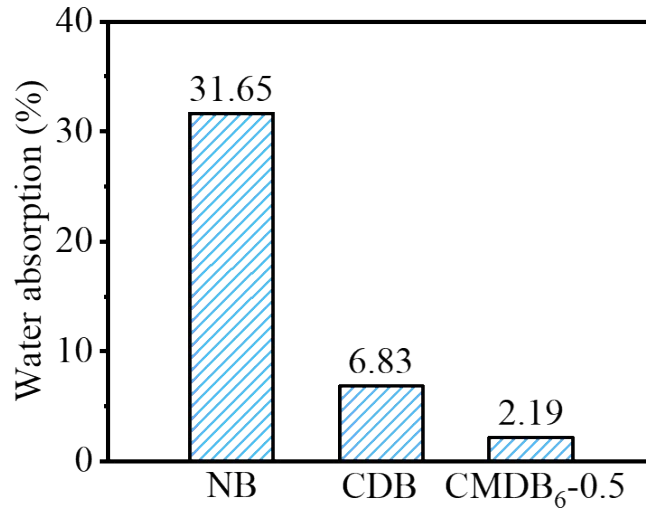

**Fig. S11.** Water absorption of NB, CDB and CMDB<sub>6</sub>-0.5.

The water absorption of NB, CDB and CMDB-0.5 specimens is presented in Fig. S11. The NB specimen shows the highest value of 31.65%, and CMDB-0.5 has the lowest value of 2.19%. After hot-pressing, a large number of pore structures including the lumens of parenchyma cells and vascular bundle, as well as intercellular space are removed from CMDB-0.5, which dramatically reduces the capillary absorption of water. Meanwhile, the successive CaCO<sub>3</sub> and PF resin thin layer furtherly prevents the water from entering the bamboo fibers. Therefore, the water absorption of CMDB-0.5 was much lower than NB and CDB.

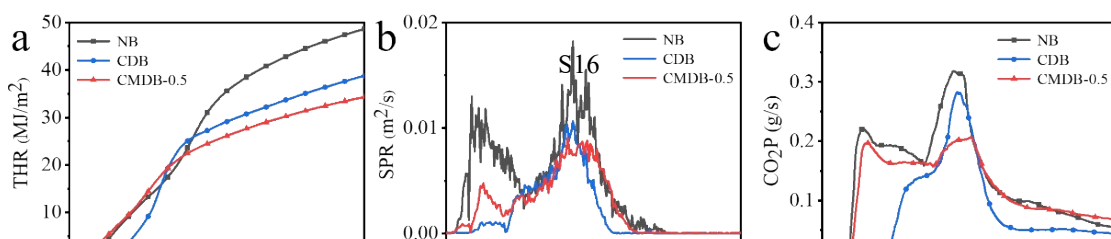



**Fig. S12.** (a) Total heat release; (b) smoke production rate; (c) CO<sub>2</sub> production rate of NB, CDB and CMDB-0.5.

The fire was ignited and spread rapidly for the NB with a total heat release (THR) was 76.9 MJ/m<sup>2</sup>. The THR of CMDB-0.5 declined to 47.9 MJ/m<sup>2</sup> with a reduction of 37.7% compared to the NB specimen, and decreased by 17.9% compared to the CDB specimen (4 MJ/m<sup>2</sup>) (Fig. S12a). The THR result shows that the mineralization of CaCO<sub>3</sub> could suppress the combustion intensity and ameliorate flame retardancy. This is in line with the result of the smoke production rate (Fig. S12b). The peak of smoke production rate for the CMDB-0.5 specimen showed the minimum values of 0.009 m<sup>2</sup>/s with a reduction 50% and 18.2% compared with the NB and CDB specimens, respectively. Fig. S12c displayed the CO<sub>2</sub> production rate of the NB (0.32 g/s), CDB (0.28 g/s), and CMDB-0.5 (0.21 g/s). Compared with the NB and CDB specimens, the CO<sub>2</sub> production rate of the CMDB-0.5 specimen decreased by 34.4% and 25%, respectively.

**Table S5** Comparison of the heat release rate and the total heat release of CMDB-0.5

with other materials.

| Materials                                                       | HRR (Kw/m <sup>2</sup> ) | THR (MJ/m <sup>2</sup> ) | Reference        |
|-----------------------------------------------------------------|--------------------------|--------------------------|------------------|
| MB3                                                             | 388.2                    | 52.9                     | 8                |
| Coated bamboo                                                   | 688.0                    | 38                       | 9                |
| BBF1                                                            | 443.2                    | 62                       | 10               |
| Mineralized bamboo                                              | 260.5                    | 45.3                     | 11               |
| MgAl-LB-6h                                                      | 372.1                    | 32.1                     | 12               |
| MTTO-b-ML                                                       | 321.3                    | 92.6                     | 13               |
| Ce-TNTs/bamboo fibre                                            | 548.6                    | 36.4                     | 14               |
| BA-bamboo/epoxy                                                 | 570.0                    | 104.7                    | 15               |
| H <sub>2</sub> Ti <sub>2</sub> O <sub>5</sub> ·H <sub>2</sub> O | 502.4                    | 35.3                     | 16               |
| TNTs/bamboo fiber                                               |                          |                          |                  |
| 6%NCS-VE/BF                                                     | 361.9                    | 20.7                     | 17               |
| Bamboo fibre/polypropylene                                      | 203.8                    | 60.5                     | 18               |
| 6%TNTs/bamboo fiber/HDPE                                        | 503.0                    | 39.6                     | 19               |
| PP/wood powder/lignin                                           | 470                      | 70.2                     | 20               |
| WPC/PATA <sub>1</sub> /APP <sub>2</sub>                         | 310                      | 80.3                     | 21               |
| EP-4.07-Wood                                                    | 262.3                    | 48.0                     | 22               |
| CaCO <sub>3</sub> beech                                         | 374.8                    | 33.9                     | 23               |
| <b>CMDB-0.5</b>                                                 | <b>302.6</b>             | <b>47.9</b>              | <b>This work</b> |

Note: MB3: mineralized bamboo (0.3mol/L Ca(C<sub>3</sub>H<sub>5</sub>O<sub>2</sub>)<sub>2</sub> and Na<sub>2</sub>CO<sub>3</sub>). BBF1: bamboo fiber/PBS/microencapsulated ammonium polyphosphate composites. MgAl-LB-6h: bamboo with nano MgAl-layered double hydroxide coating. MTTO-b-ML: phosphorus-containing tung-oil-based polyol-coated melamine-modified bamboo. 6%NCS-VE/BF: chitosan-based bioflame retardant additive-vinyl ester/bamboo fiber. WPC/PATA1/APP2: wood-plastic composites/phytic acid-tyramine salt/ammonium polyphosphate. EP-4.07-Wood: wood with vanillin and benzene phosphorous oxydichloride coating.

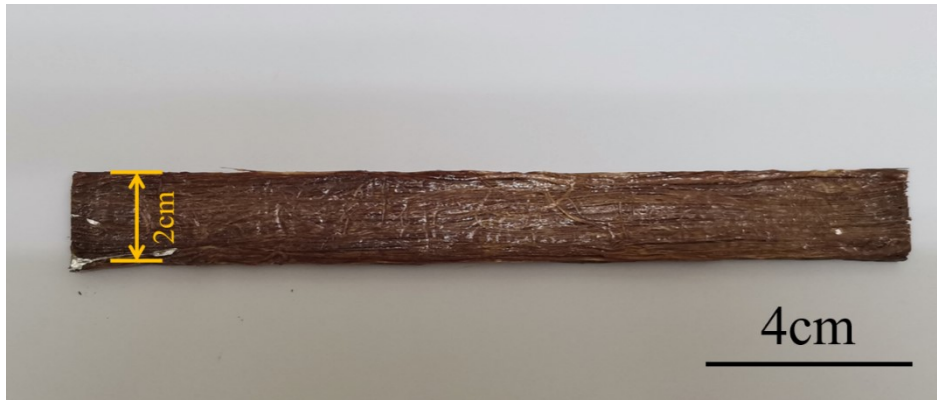

**Fig. S13.** Photograph of the CMDDB-0.5 of a large scale sample (16 cm in length, 2cm in width).

## References

1. Z. H. Li, C. J. Chen, H. Xie, Y. Yao, X. Zhang, A. Brozena, J. G. Li, Y. Ding, X. P. Zhao, M. Hong, H. Y. Qiao, L. M. Smith, X. J. Pan, R. Briber, S. Q. Shi and L. B. Hu, *Nat. Sustain.*, 2022, **5**, 235-244.
2. J. K. Huang and W. B. Young, *Compos Part B-Eng*, 2019, **166**, 272-283.
3. H. Chen, H. T. Cheng, G. Wang, Z. X. Yu and S. Q. Shi, *J Wood Sci*, 2015, **61**, 552-561.
4. K. N. Guo, C. Zhang, L. H. Xu, S. C. Sun, J. L. Wen and T. Q. Yuan, *Bioresour. Technol.*, 2022, **354**, 9.
5. A. Stoica-Guzun, M. Stroescu, S. Jinga, I. Jipa, T. Dobre and L. Dobre, *Ultrason. Sonochem.*, 2012, **19**, 909-915.
6. H. Moura, L. M. A. Campos, V. L. da Silva, J. C. F. de Andrade, S. M. N. de Assumpcao, L. A. M. Pontes and L. S. de Carvalho, *Cellulose*, 2018, **25**, 5669-5685.
7. J. M. Xue, H. S. Ma, E. H. Song, F. Han, T. Li, M. Zhang, Y. F. Zhu, J. J. Liu and C. T. Wu, *Adv. Healthc. Mater.*, 2022, **11**, 11.
8. L. He, G. G. Bao, X. F. Zhang, X. F. Yue, Y. He and D. C. Qin, *Ind Crop Prod*, 2023, **202**, 117110.
9. C. H. Peng, J. H. Zhong, X. J. Ma, A. Huang, G. R. Chen, W. A. Luo, B. R. Zeng, C. H. Yuan, Y. T. Xu and L. Z. Dai, *Prog Org Coat*, 2022, **167**, 106830.
10. S. B. Nie, X. L. Liu, G. L. Dai, S. J. Yuan, F. Cai, B. X. Li and Y. Hu, *J. Appl. Polym. Sci.*, 2012, **125**, E485-E489.
11. L. He, G. G. Bao, X. B. Jin, R. Zhang and D. C. Qin, *Ind Crop Prod*, 2023, **197**, 116644.
12. X. L. Yao, C. G. Du, Y. T. Hua, J. J. Zhang, R. Peng, Q. L. Huang and H. Z. Liu, *J. Nanomater.*, 2019, **2019**, 9067510.
13. Z. W. Wang, S. L. Yang, Z. Liu, F. J. Ding, N. Ji and Y. Q. Wu, *Constr Build Mater*, 2023, **366**, 130240.
14. Z. L. Teng, C. L. Ye, C. M. Zheng, F. Chen, Y. Y. Li, S. L. Wen, J. Cai and P. Fei,

- Polym Degrad Stabil*, 2019, **168**, 108950.
15. W. W. Guo, E. N. Kalali, X. Wang, W. Y. Xing, P. Zhang, L. Song and Y. Hu, *Ind Crop Prod*, 2019, **138**, 111478.
  16. C. M. Zheng, S. L. Wen, Z. L. Teng, C. L. Ye, Q. L. Chen, Y. H. Zhuang, G. G. Zhang, J. Cai and P. Fei, *Cellulose*, 2019, **26**, 2729-2741.
  17. M. N. Prabhakar, K. V. Chalapathi, A. U. R. Shah and J. Song, *Cellulose*, 2021, **28**, 11625-11643.
  18. X. B. Jin, E. L. Xiang, R. Zhang, D. C. Qin, Y. He, M. L. Jiang and Z. H. Jiang, *J Mater Res Technol*, 2022, **17**, 3138-3149.
  19. P. Fei, X. Chen, H. G. Xiong, D. Zia ud, L. Chen and J. Cai, *Compos. Pt. A-Appl. Sci. Manuf.*, 2016, **90**, 225-233.
  20. L. N. Liu, M. B. Qian, P. A. Song, G. B. Huang, Y. M. Yu and S. Y. Fu, *Acs Sustain Chem Eng*, 2016, **4**, 2422-2431.
  21. Y. M. Leng, X. Zhao, T. Fu, X. L. Wang and Y. Z. Wang, *Acs Sustain Chem Eng*, 2022, **10**, 5055-5066.
  22. M. L. Li, X. H. Hao, M. L. Hu, Y. S. Huang, C. Tang, Y. Y. Chen and L. P. Li, *Prog Org Coat*, 2022, **172**, 107161.
  23. A. Pondelak, A. S. Skapin, N. Knez, F. Knez and T. Pazlar, *Green Chem.*, 2021, **23**, 1130-1135.
